# Supplementary material for: Metabacillus dongyingensis sp. nov. Is Represented by the Plant Growth-Promoting Bacterium BY2G20 Isolated from Saline-Alkaline Soil and Enhances the Growth of Zea mays L. under Salt Stress
Source: PubMed Central journal article supplement (PMC9040632; doi:10.1128/msystems.01426-21), 2022-03-01

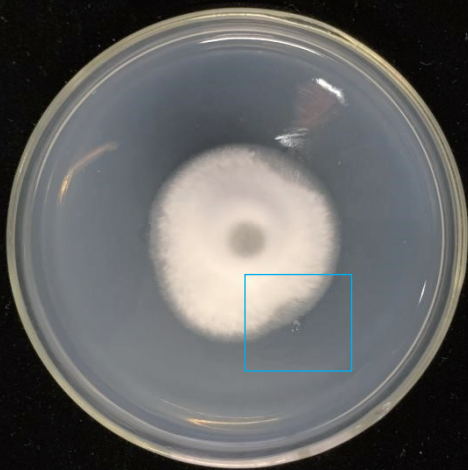

Supplement: msystems.01426-21-sf001.pdf [file msystems.01426-21-sf001.pdf]
