# Supplementary material for: Metabacillus dongyingensis sp. nov. Is Represented by the Plant Growth-Promoting Bacterium BY2G20 Isolated from Saline-Alkaline Soil and Enhances the Growth of Zea mays L. under Salt Stress
Source: PubMed Central journal article supplement (PMC9040632; doi:10.1128/msystems.01426-21), 2022-03-01

A

Neighbour-joining tree

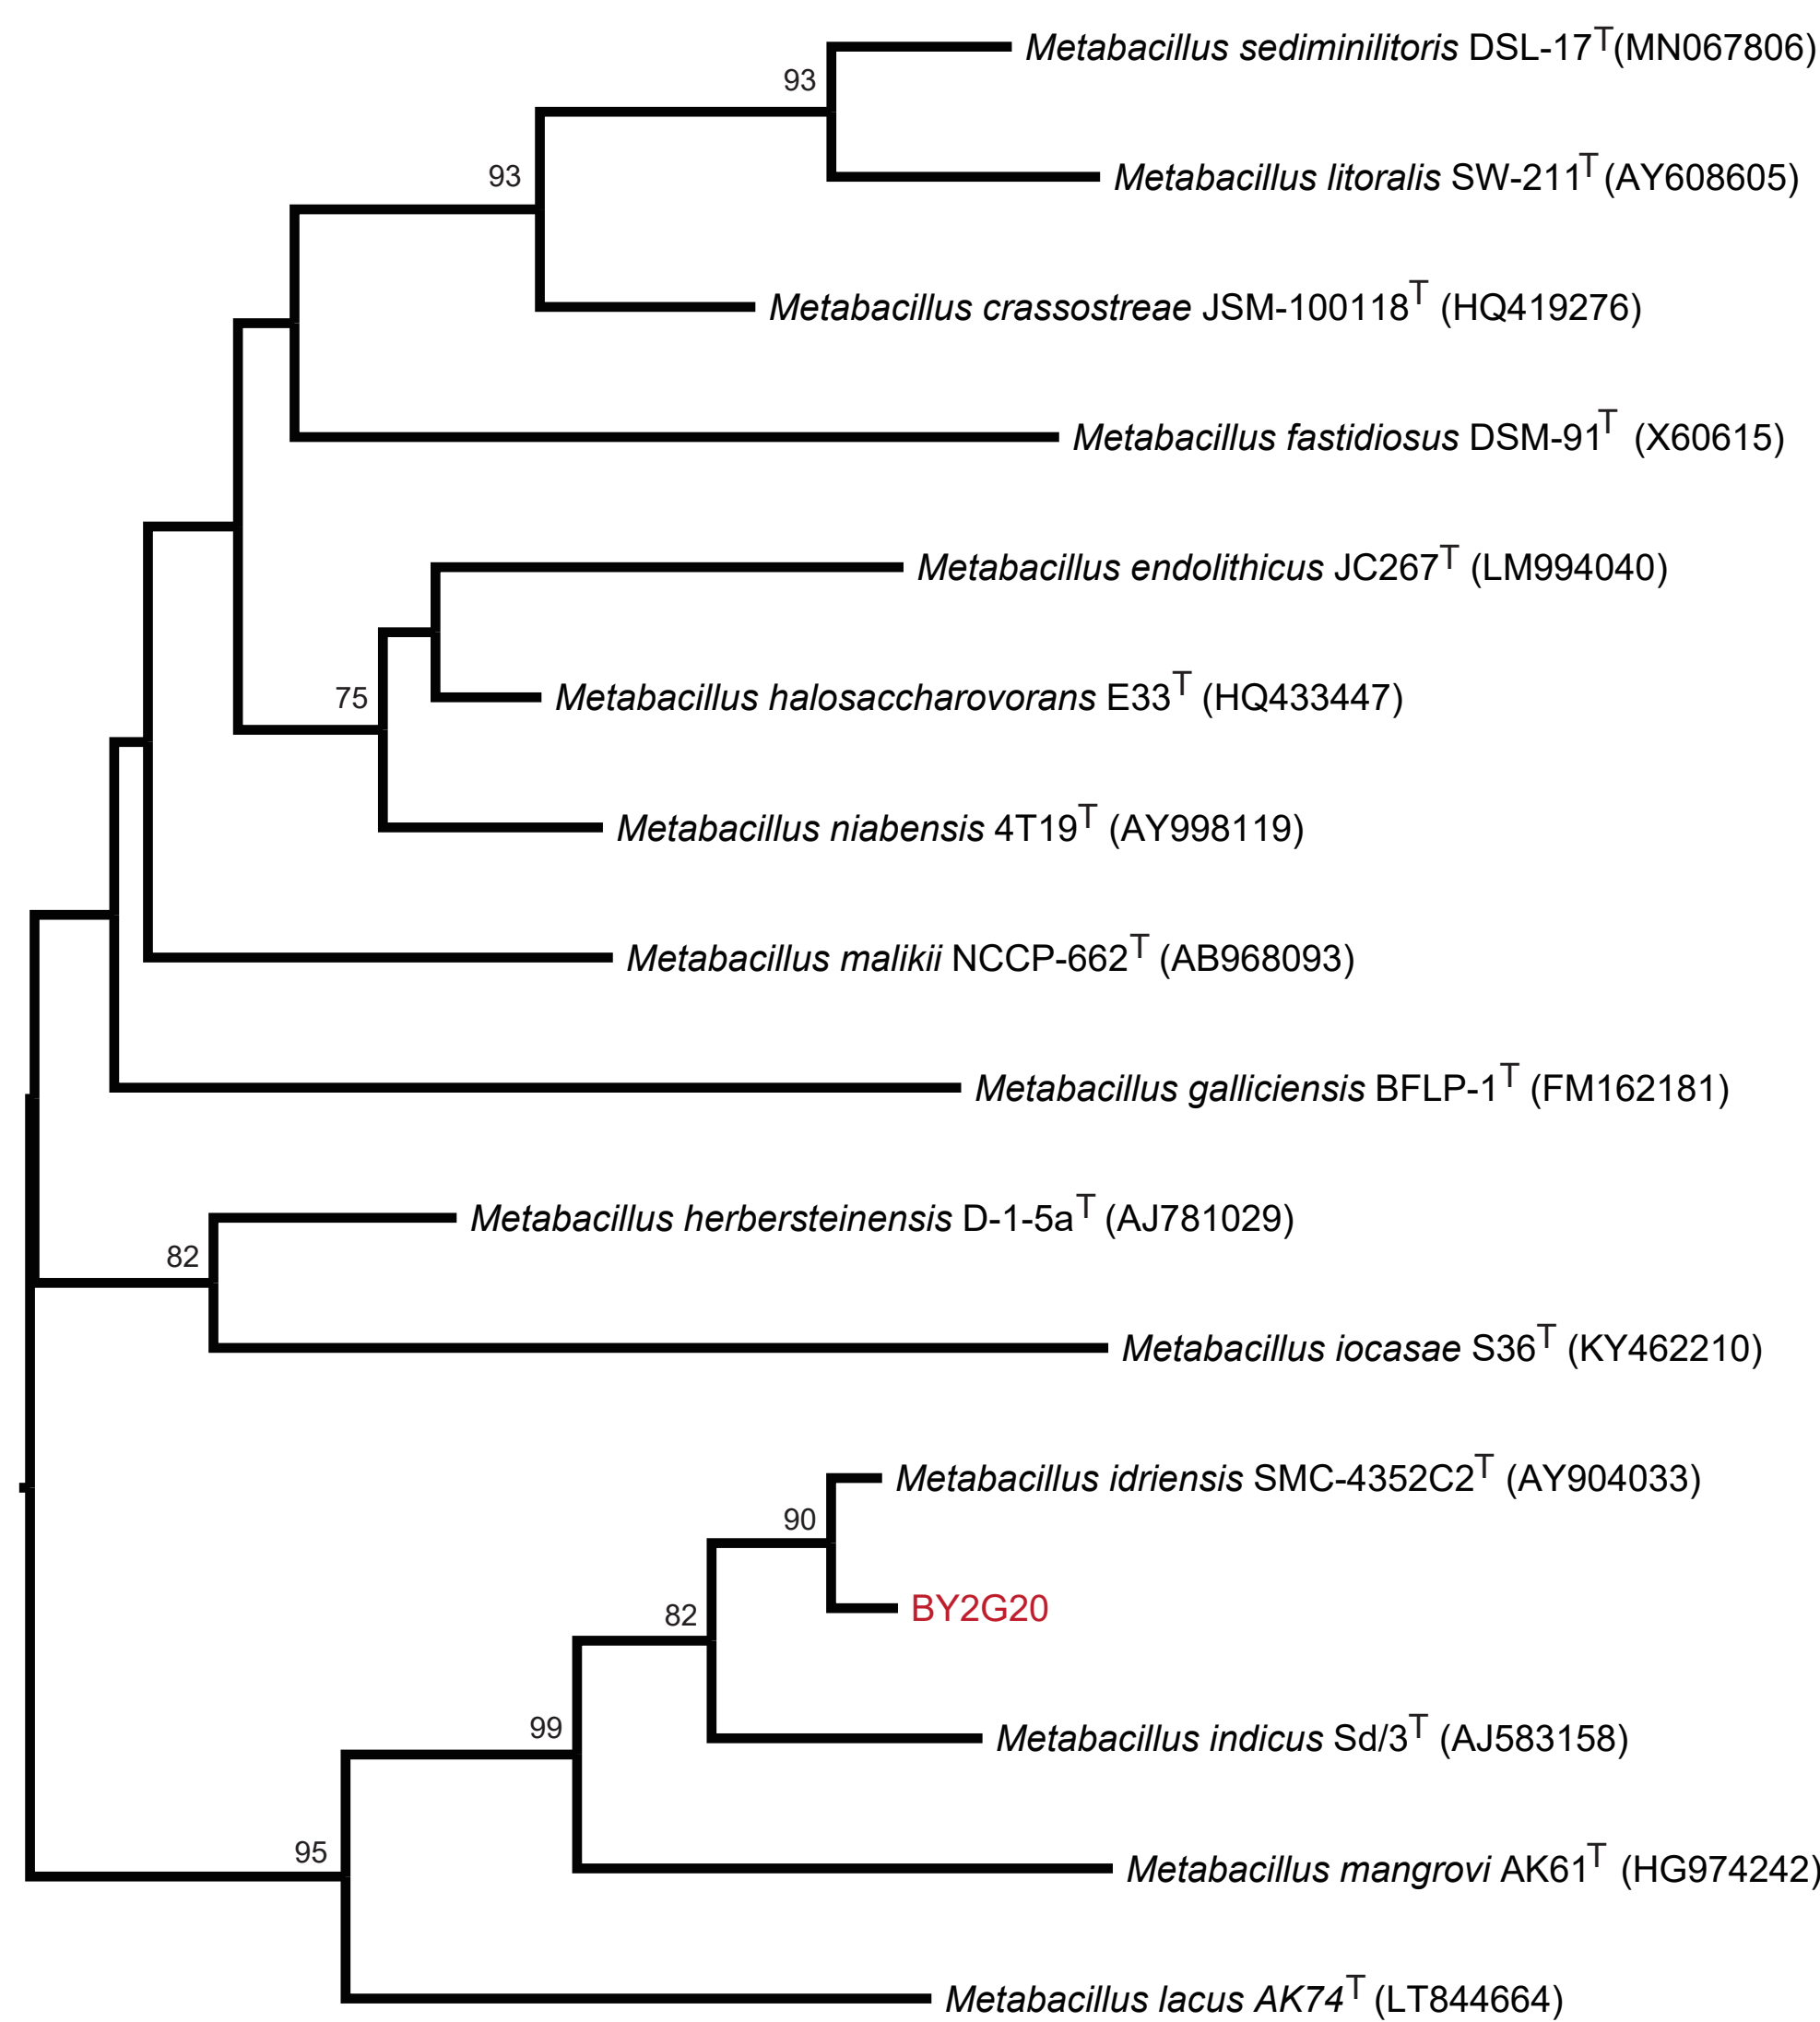

B

Minimum-evolution tree

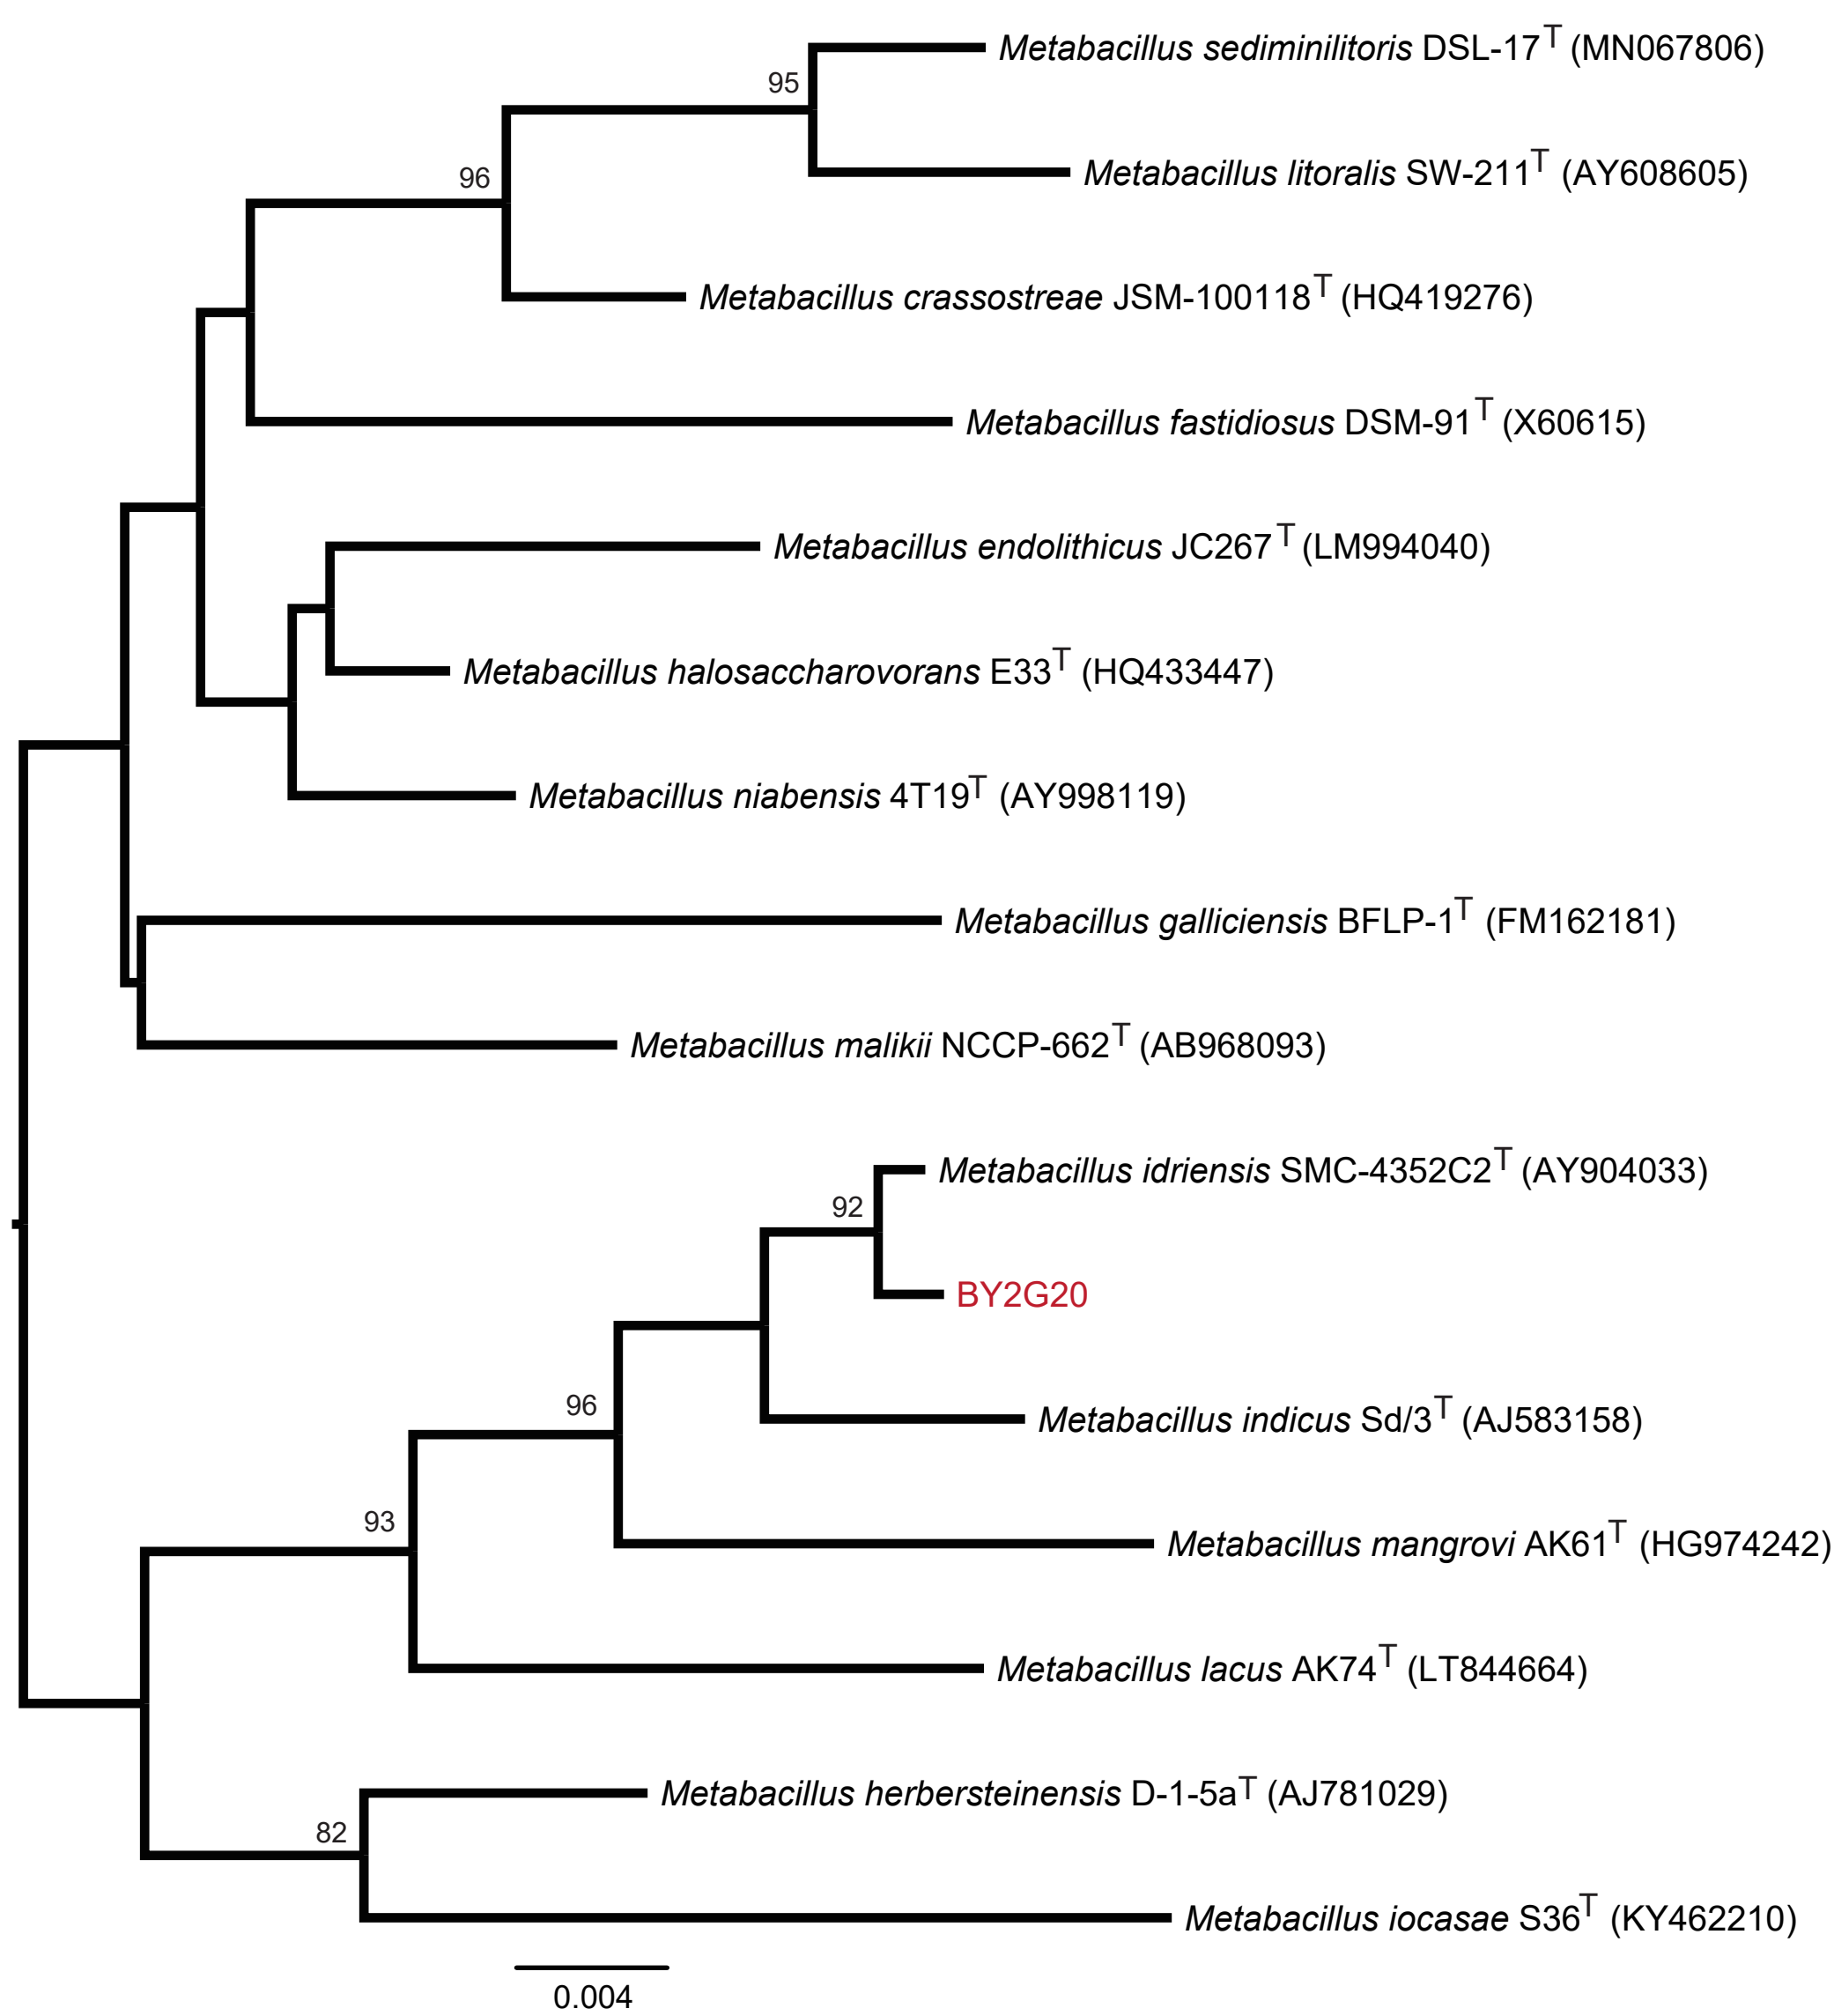

C

BGC2 (2668696 - 2692606)

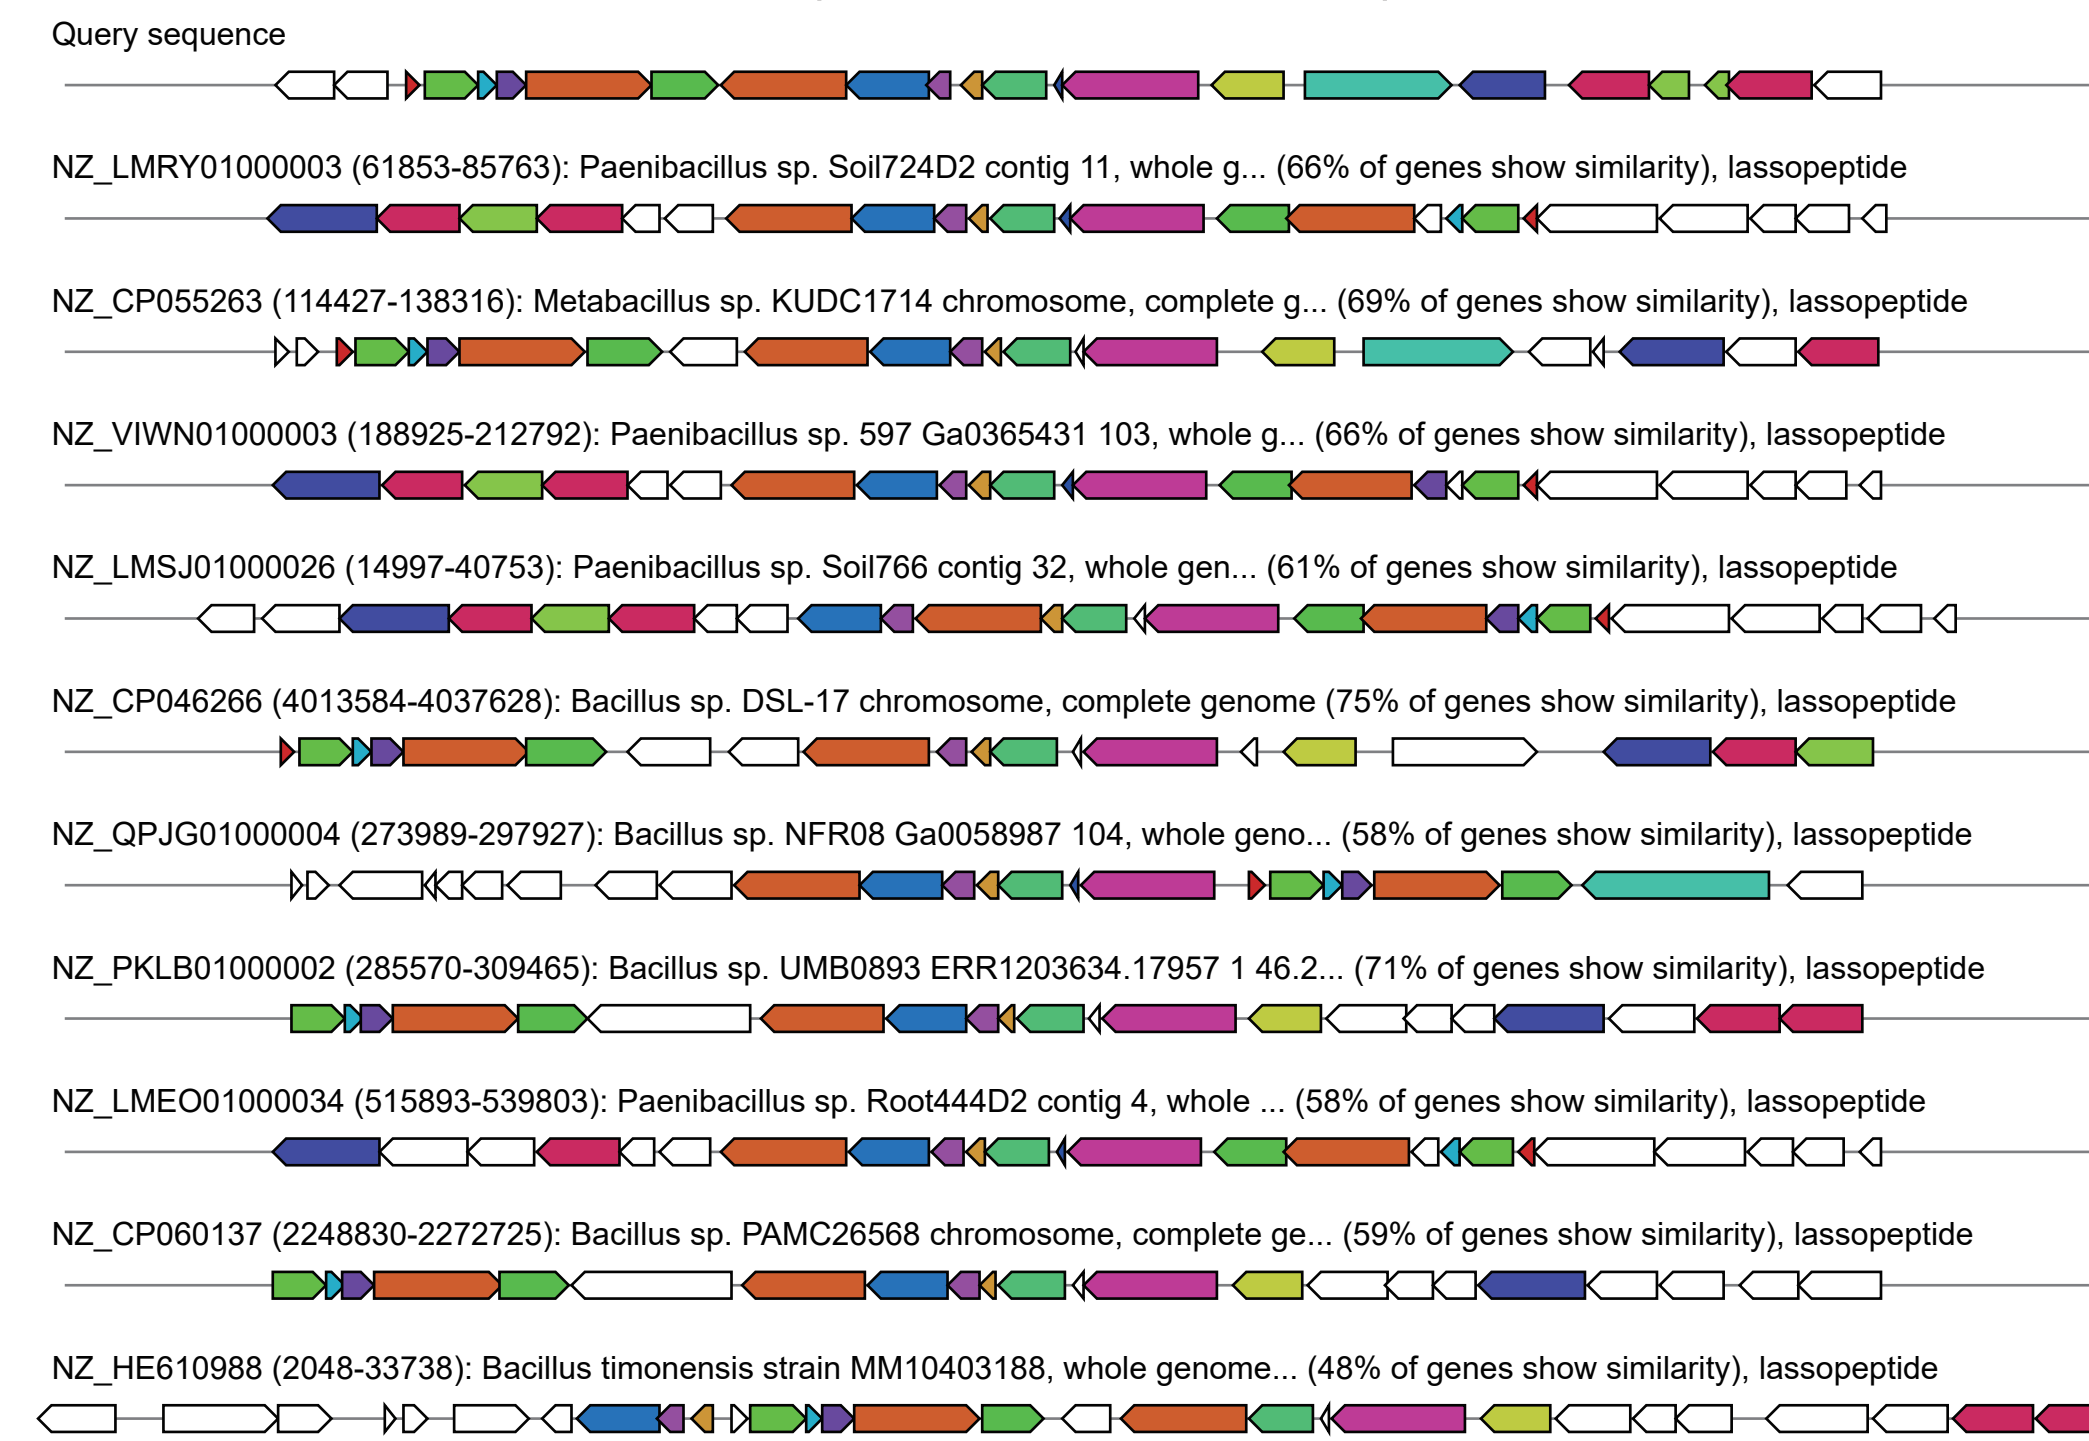

BGC 4 (2782566 - 2803706)

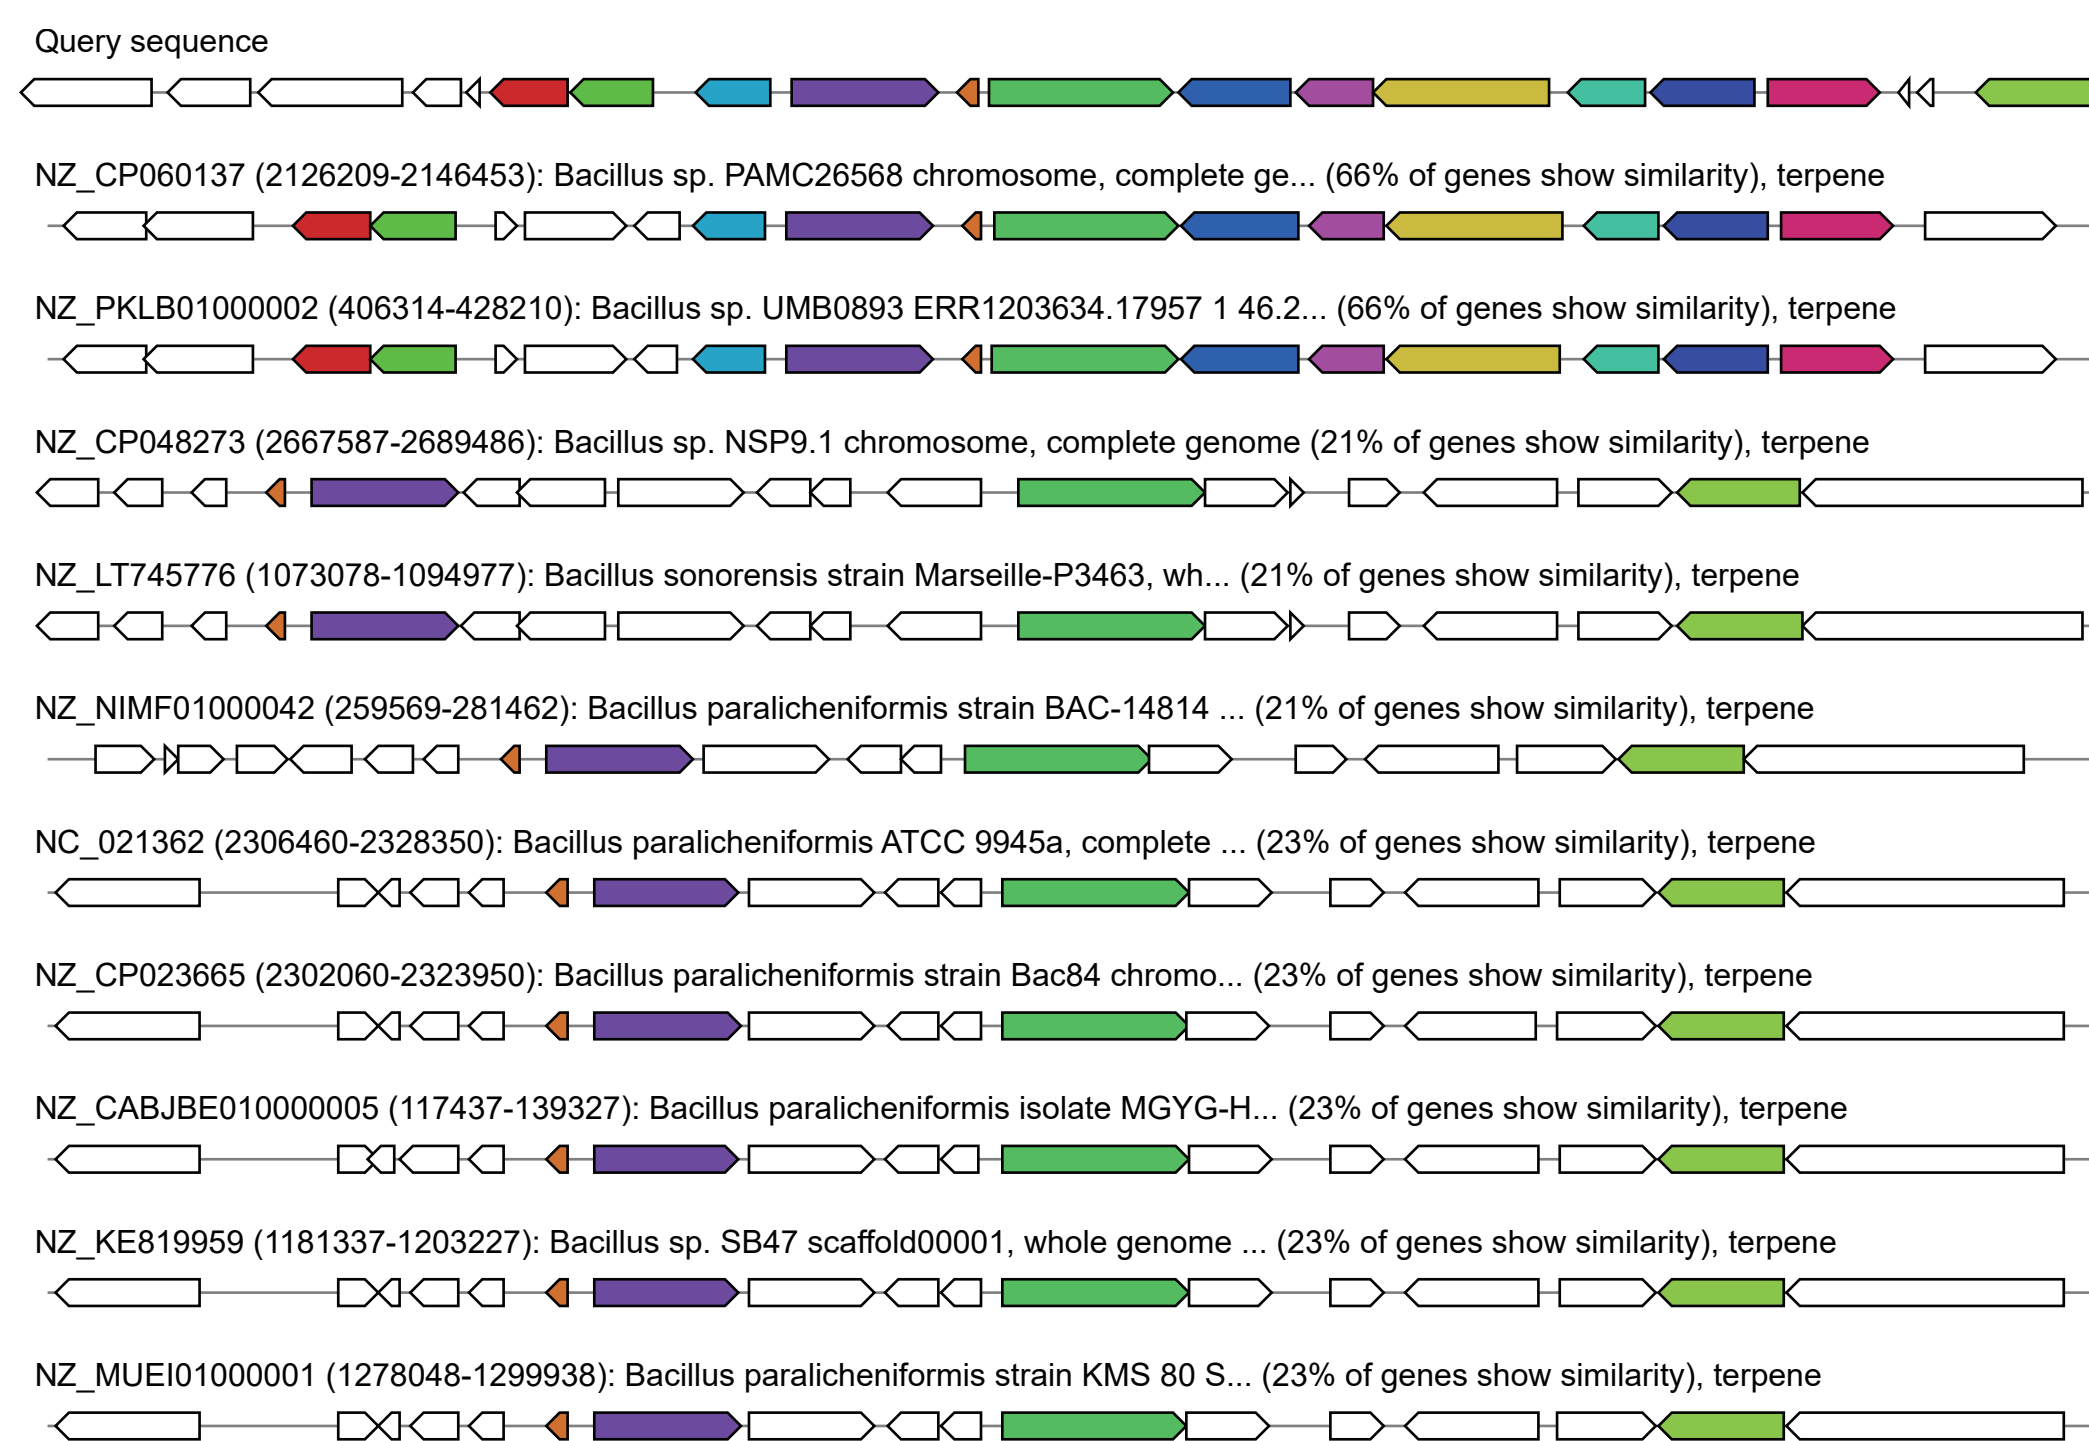

BGC 7 (3261363 - 3302463)

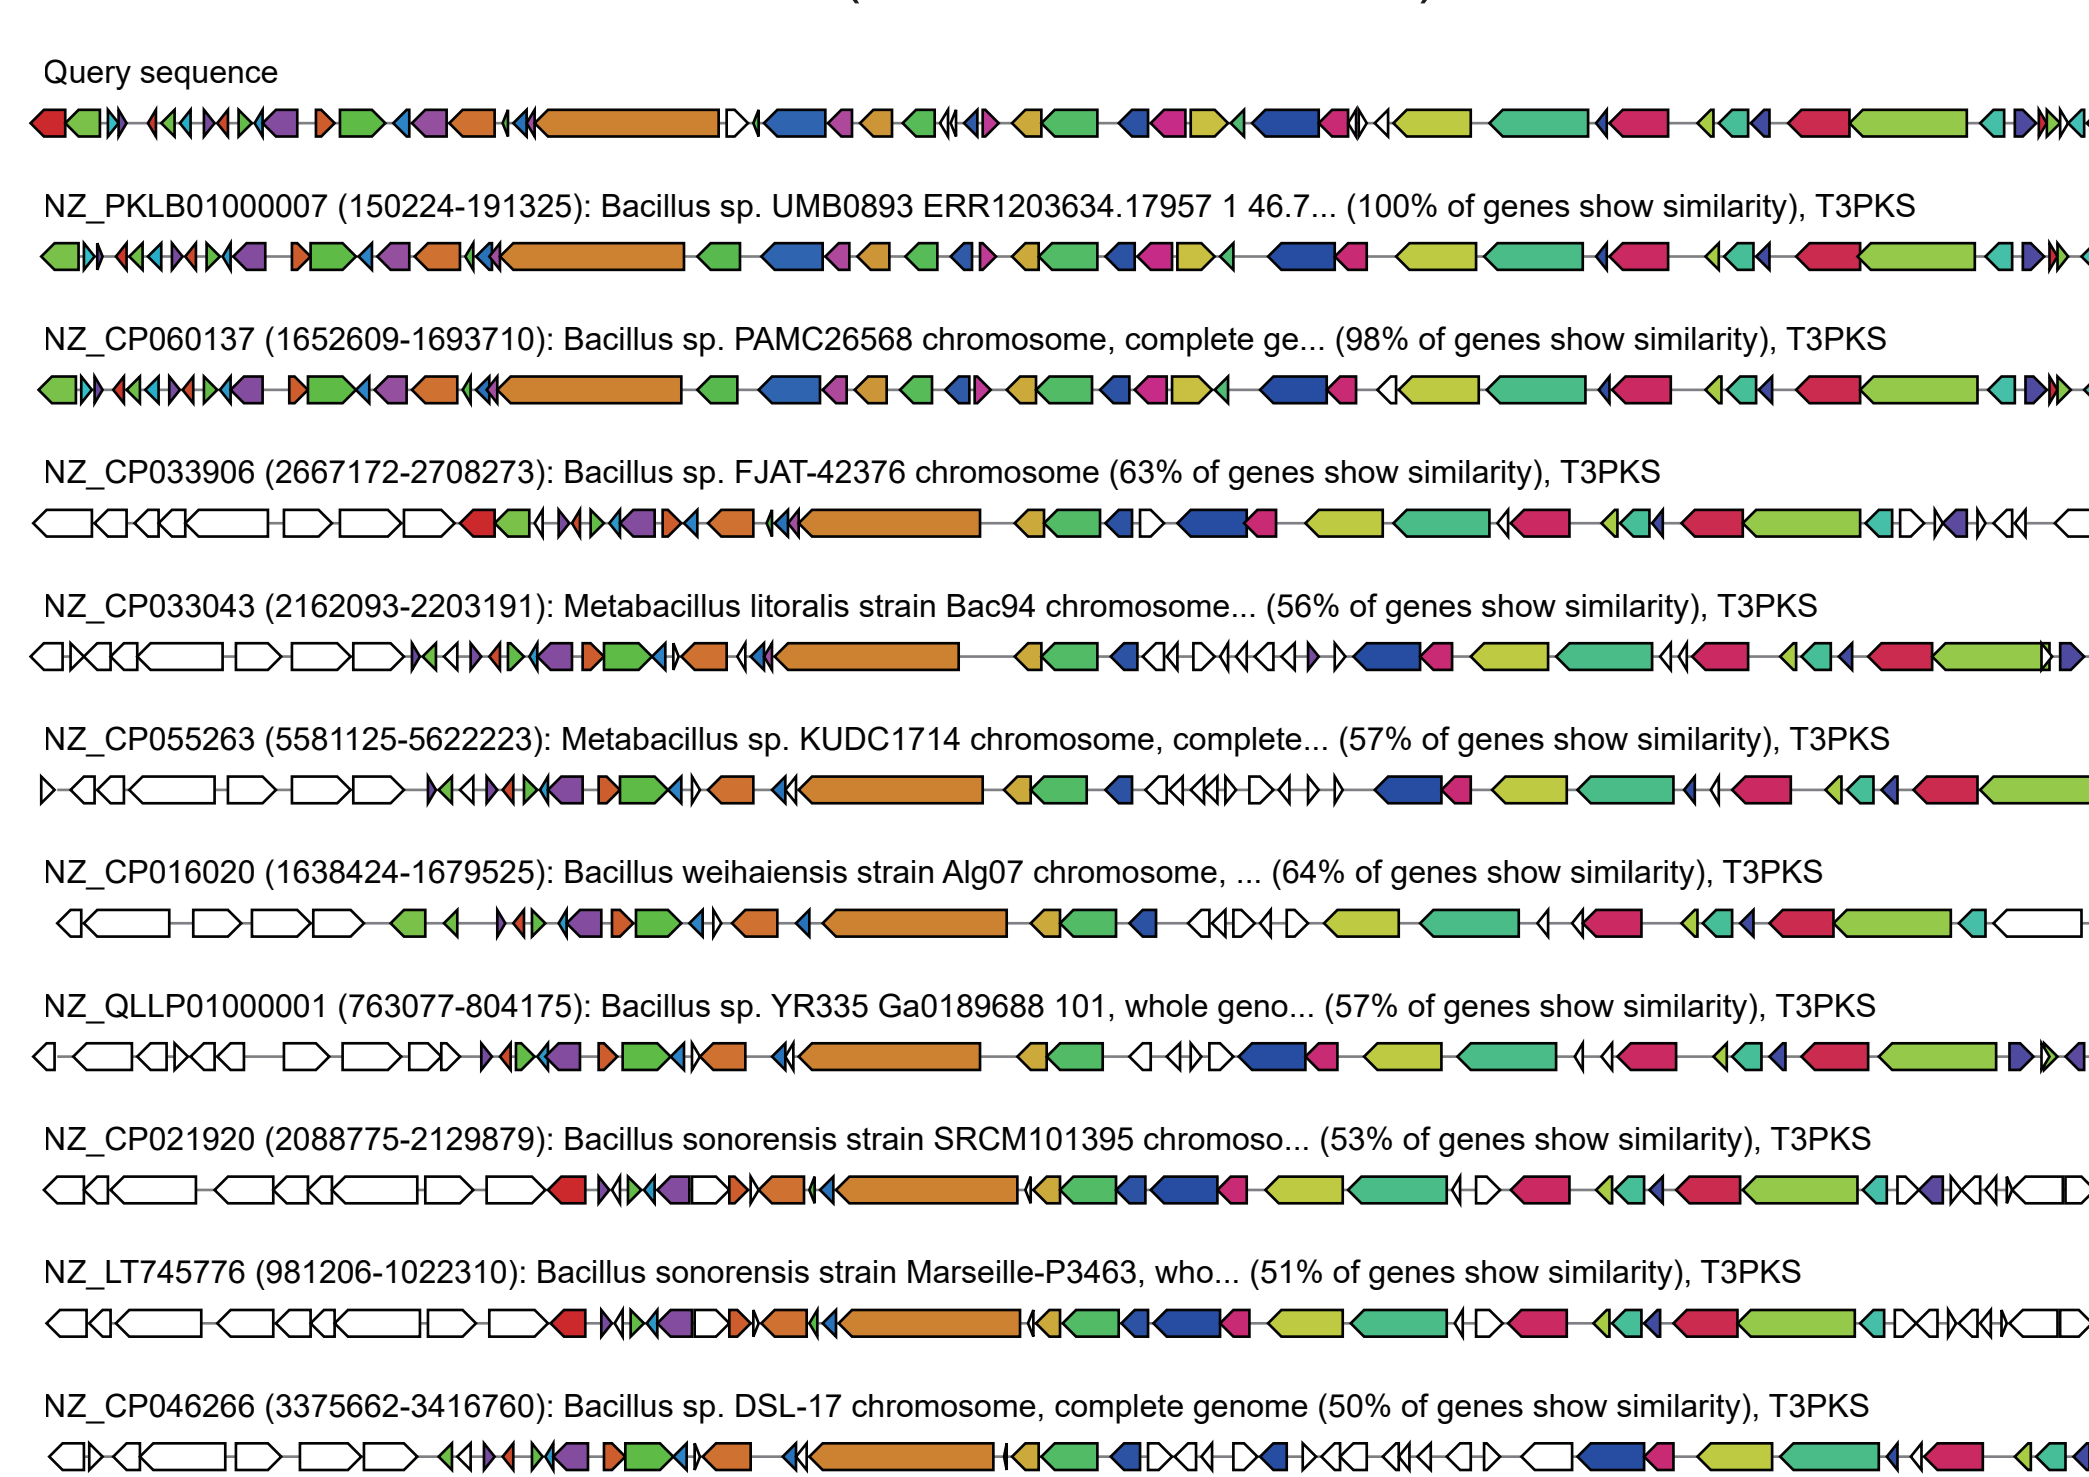

BGC 3 (2723881 - 2739317)

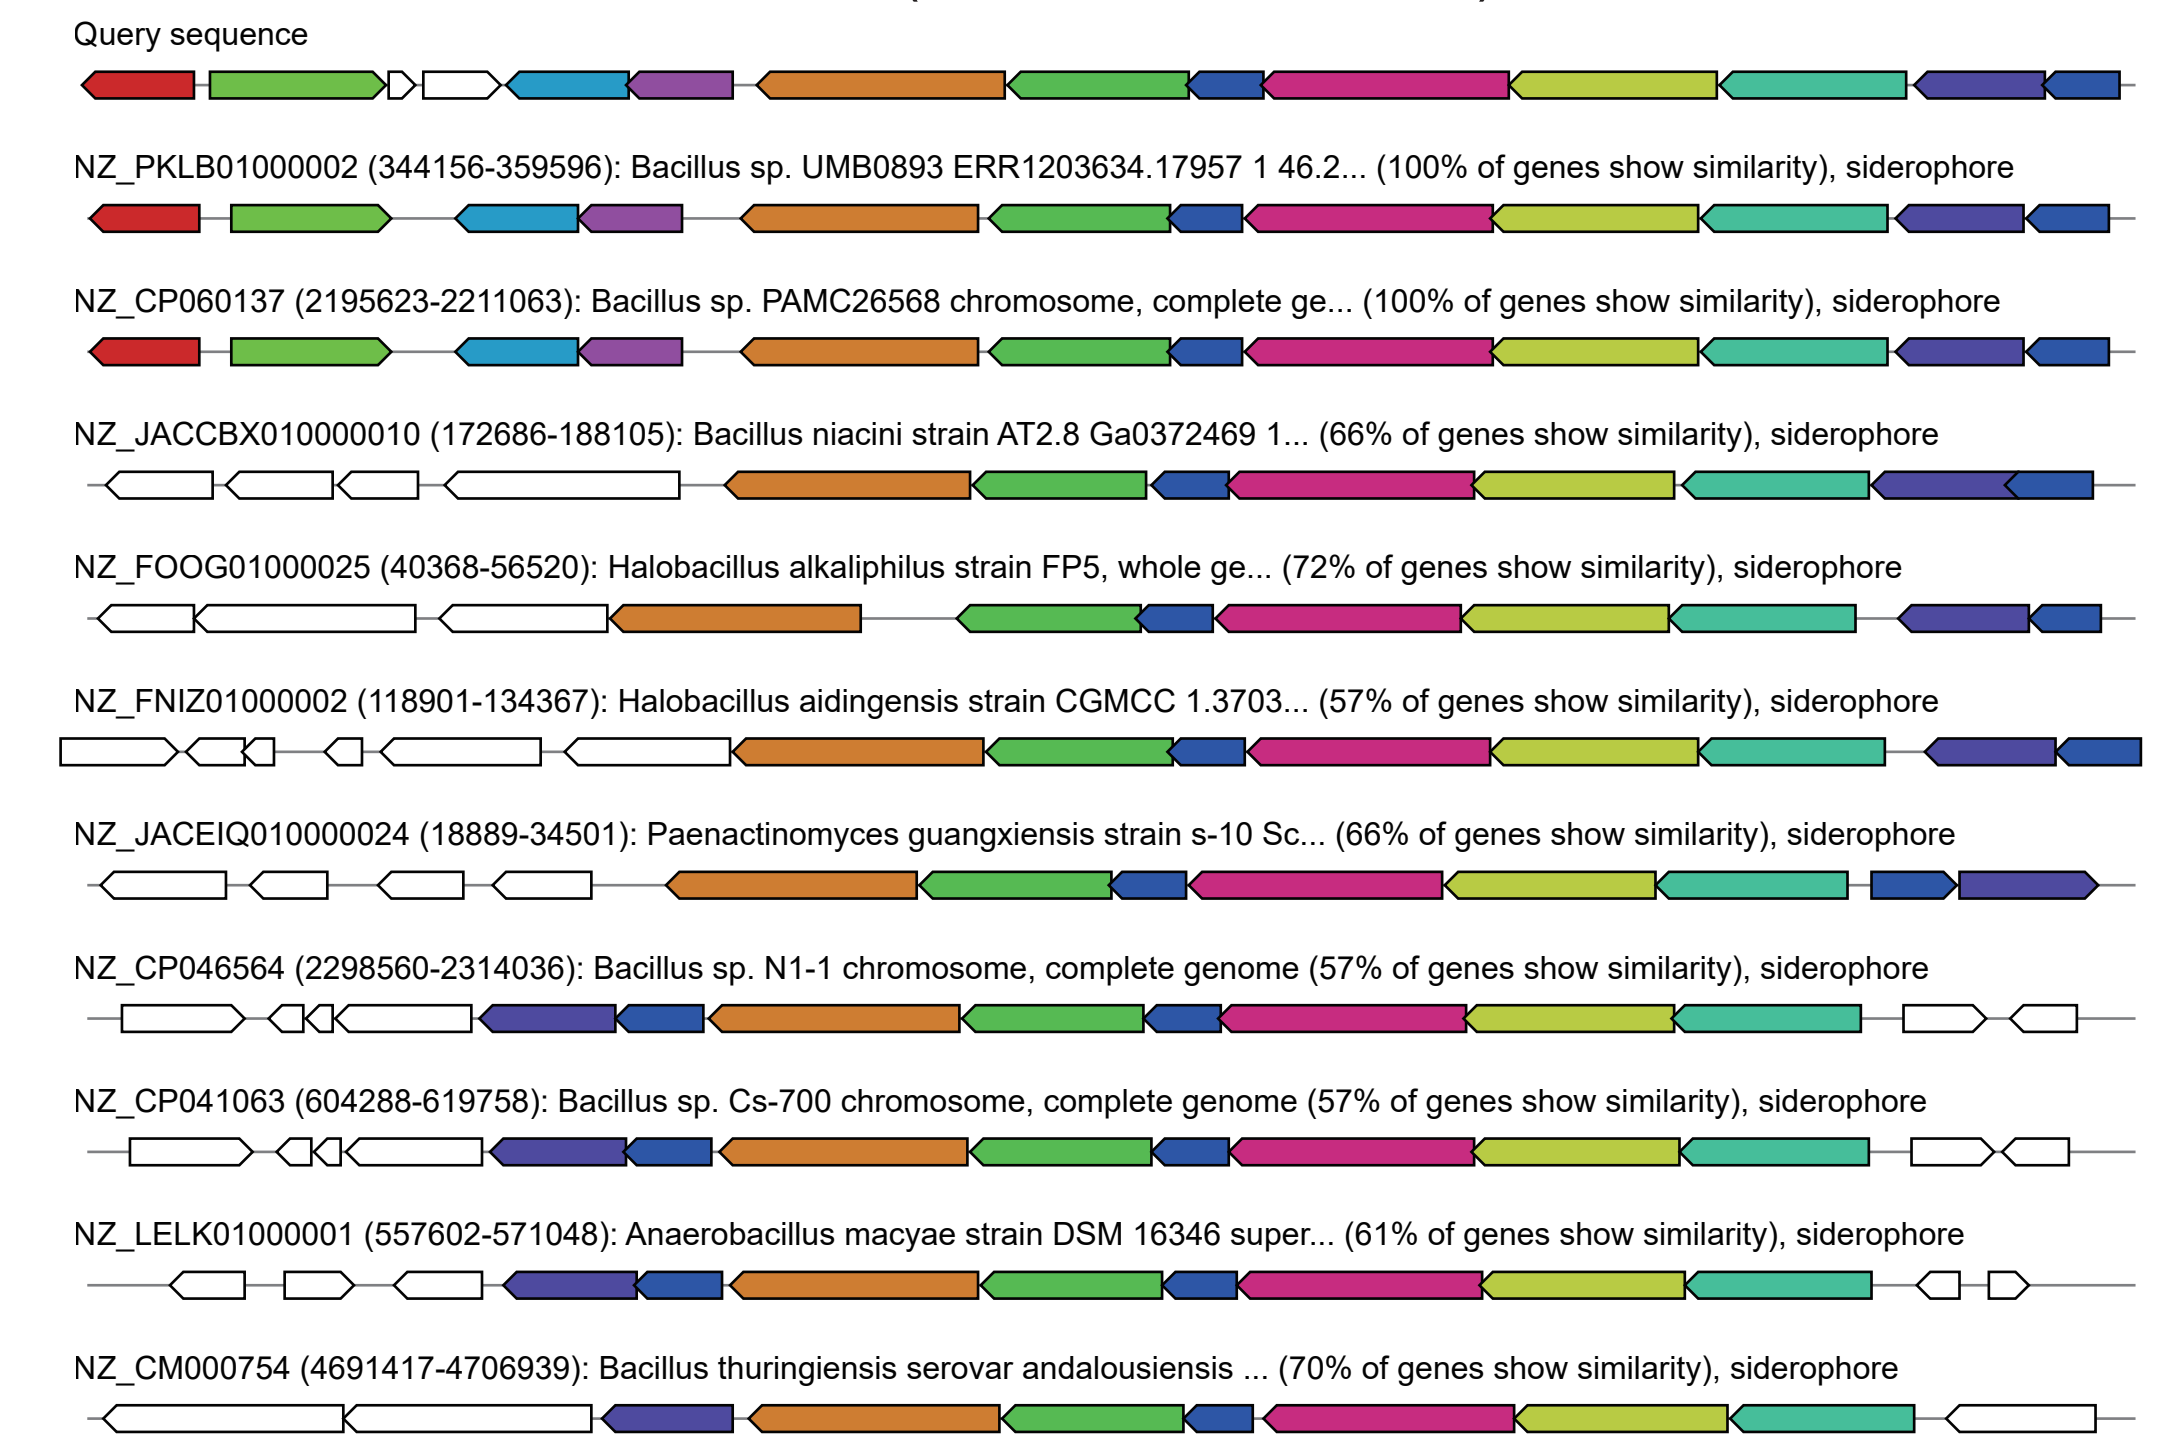

BGC 5 (2940637 - 3010533)

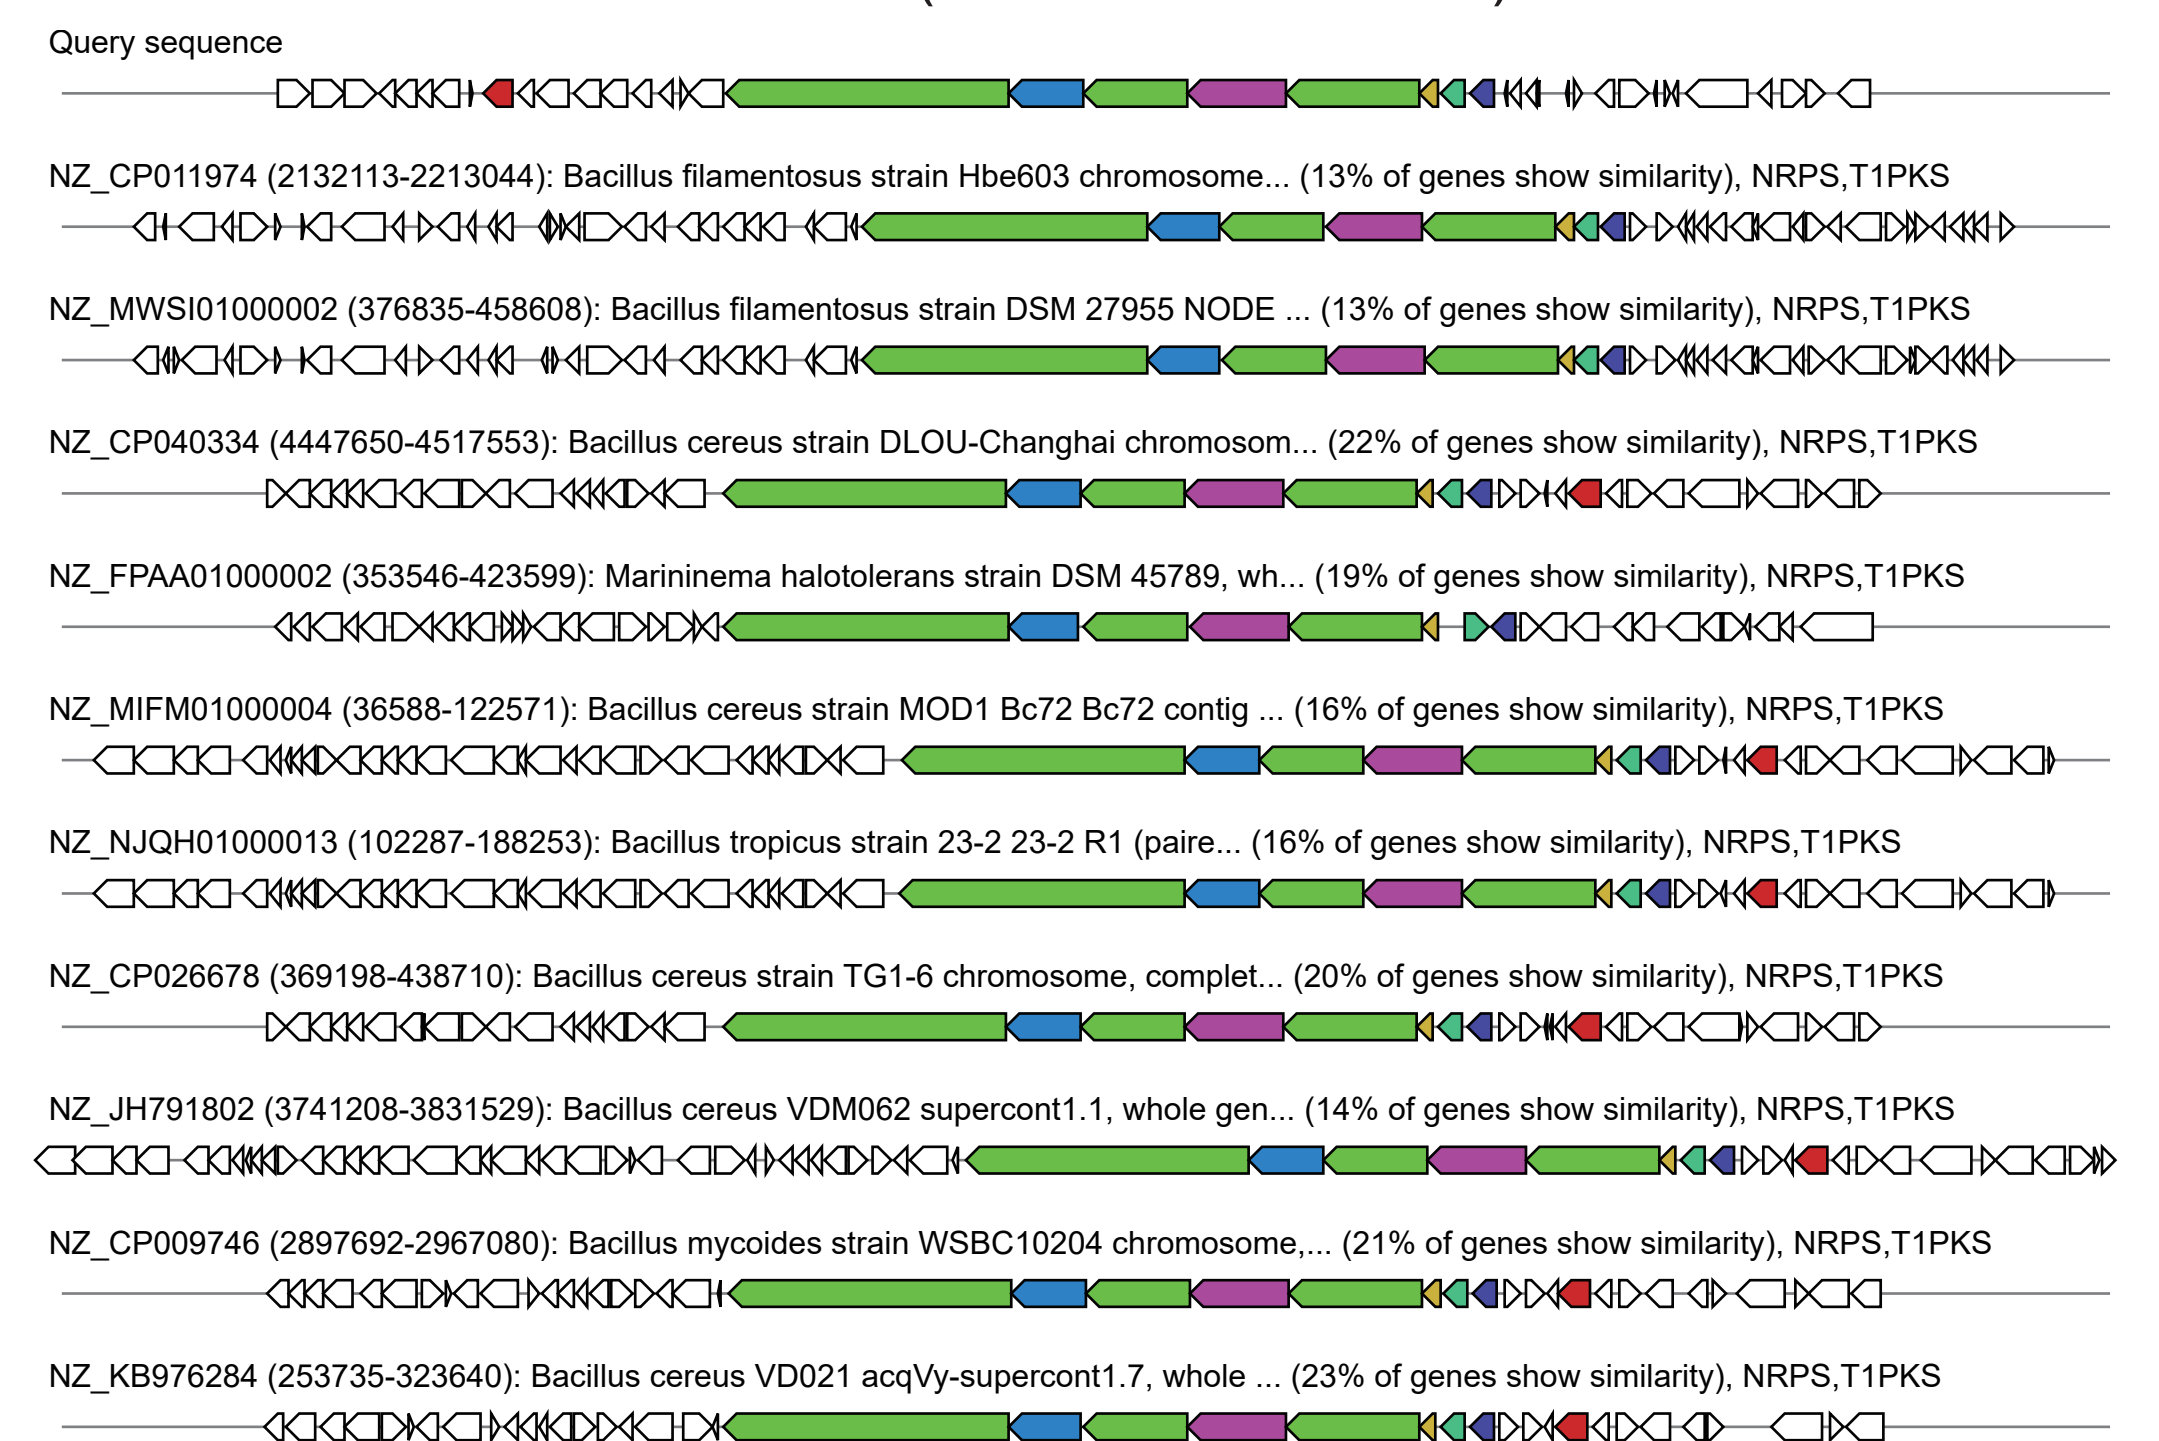

BGC 8 (4062489 - 4086025)

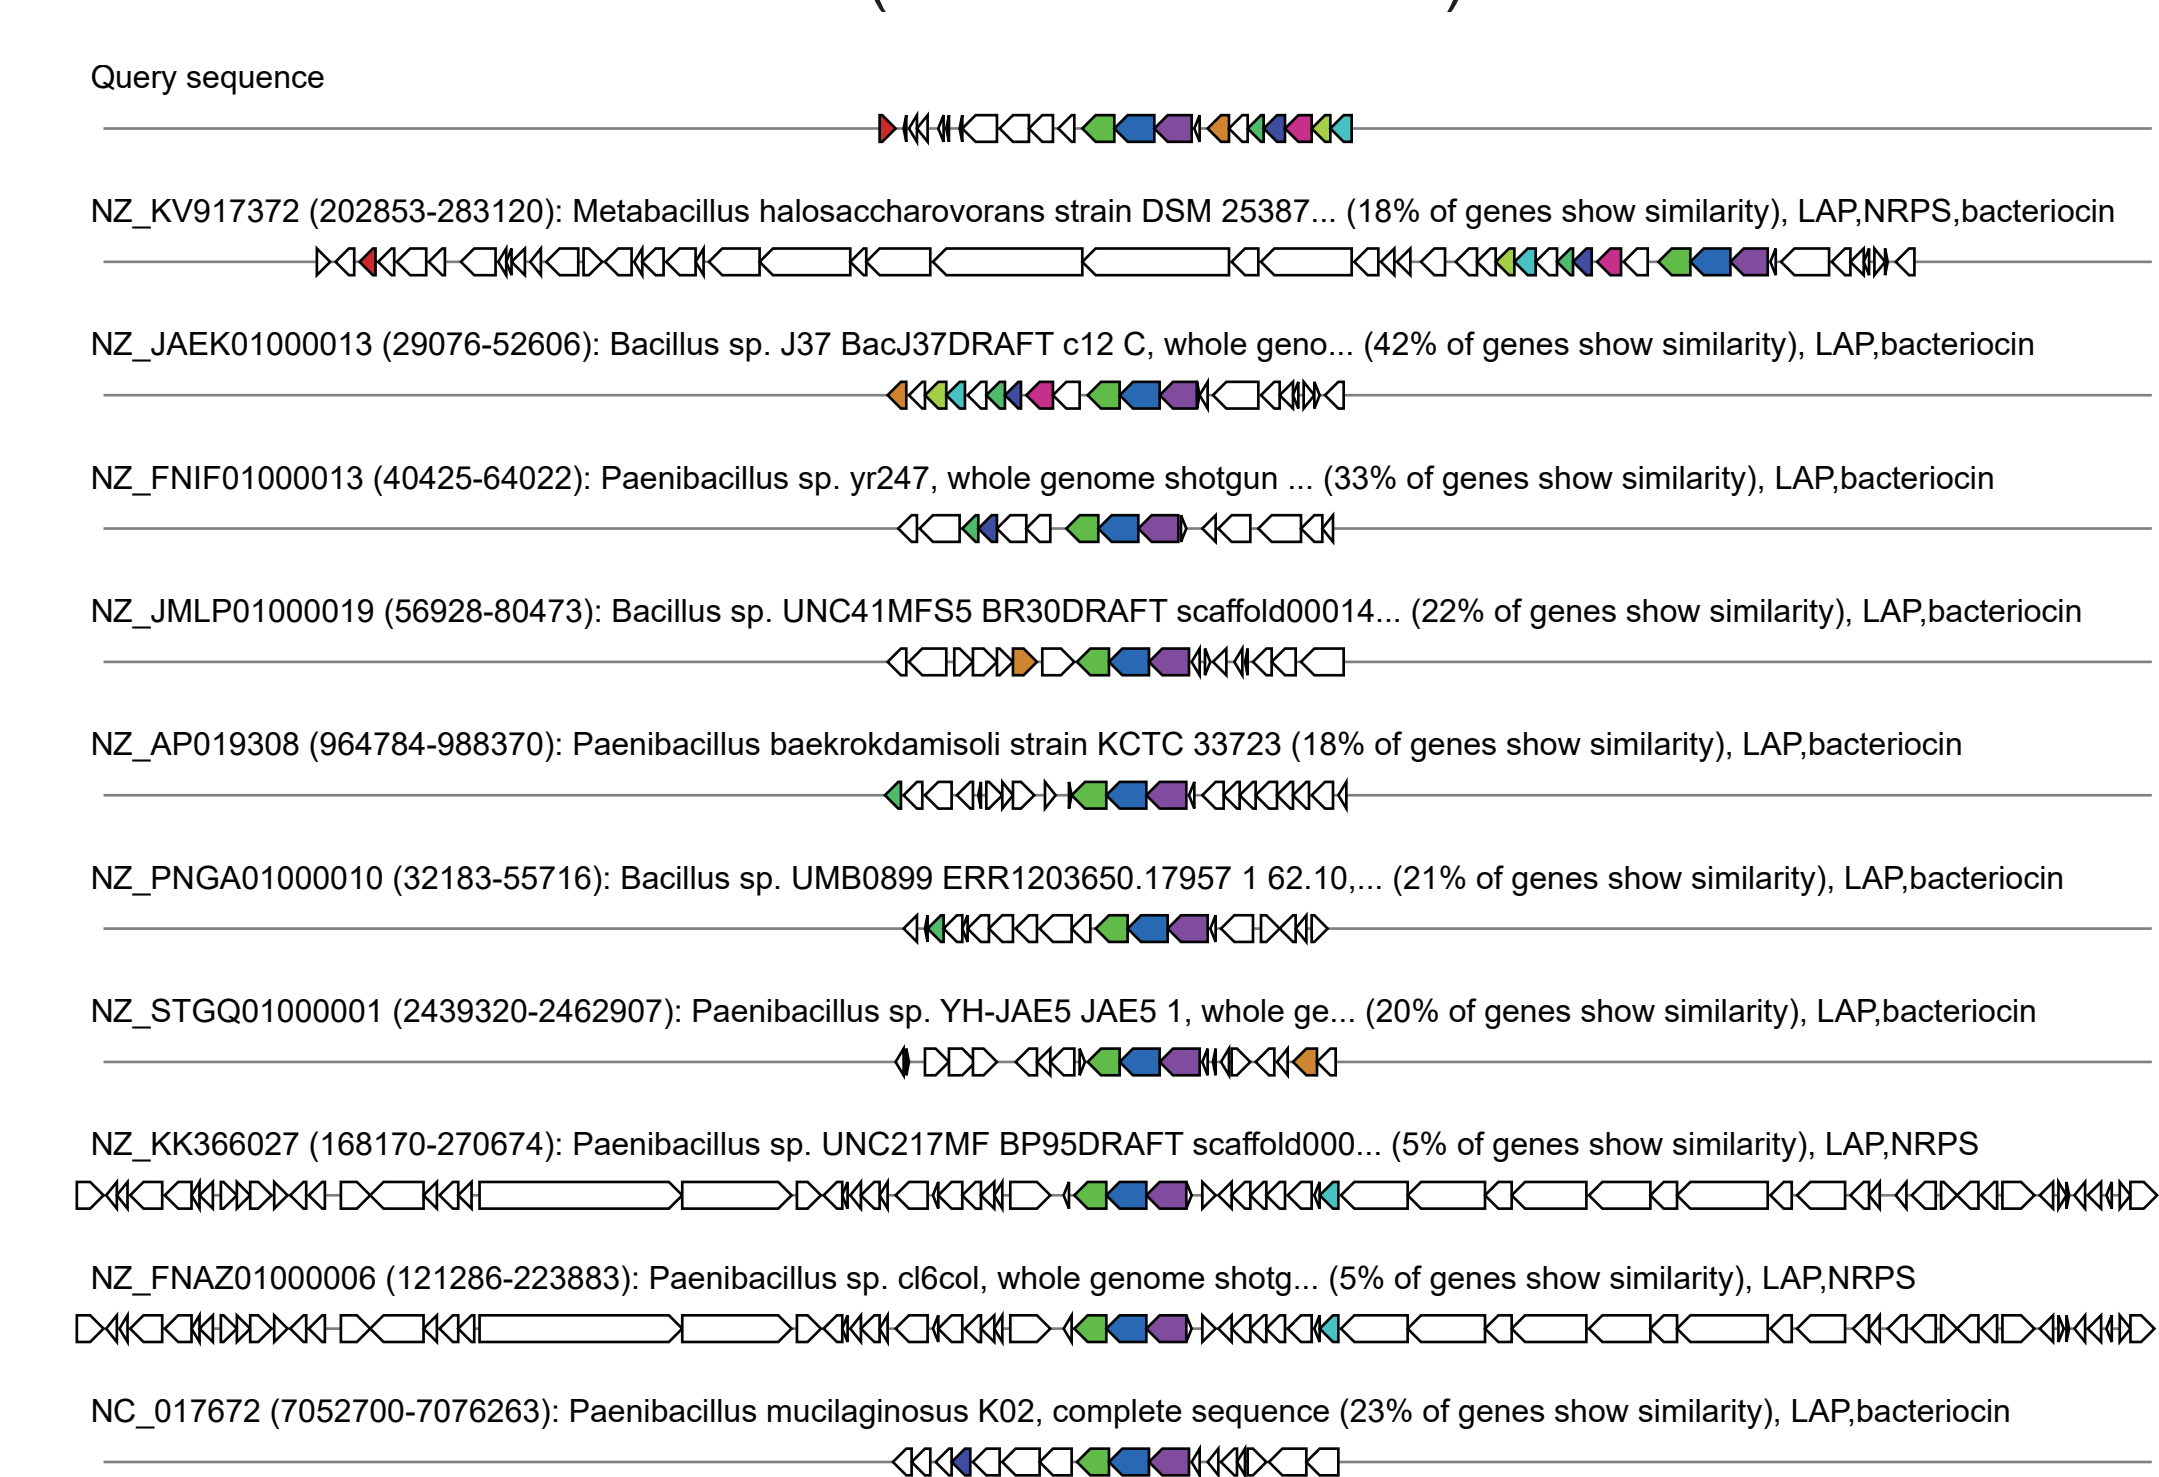

Supplement: msystems.01426-21-sf002.pdf [file msystems.01426-21-sf002.pdf]
